# Supplementary material
Source: publisher figshare collection journal article supplement (https://gsapubs.figshare.com/articles/dataset/_/12540434)
Supplement: Supplementary file 1 [file 1]

## Sheet: Feuil1
	Run time	Sample name	CO2 in glass (ppm)	ρCO2 g/cm3	Bubble Volume (cm3)	CO2 total (ppm)	Error CO2 total (ppm)	% CO2 in bubble	Error % CO2 in bubble	H2O in glass (wt%)	SO2 in glass (ppm)	Cl in glass (ppm)	F in glass (ppm)	Pressures (MPa)	Error Pressures (MPa)	Depths (km)	Error Depths (km)
Intact
	30 minutes	30_1_1	649.8 ± 95.9	0.09 ± 0.03	4.21x10^-10	2119.05		69.3805		0.004 ± 0.005	902.0 ± 33.2	45.3 ± 5.1	4.8 ± 0.7	394.688		11.8406
					3.57x10^-10		632.228		7.00146						94.609		2.83828
					4.93x10^-10		-565.474		-11.2064						-92.383		-2.77148
		30_1_2	202.9 ± 33.4	0.11 ± 0.03	5.75x10^-10	3630.63		94.4287		0.002 ± 0.005	690.3 ± 36.9	44.3 ± 4.3	10.1 ± 0.9	608.438		18.2531
					4.95x10^-10		1496.19		1.61234						176.875		5.30625
					6.62x10^-10		-1052		-2.29989						-144.141		-4.32422
		30_1_4	256.9 ± 39.1	0.10 ± 0.03	5.03x10^-10	2049.65		87.4877		0.002 ± 0.005	802.1 ± 29.5	34.1 ± 4.6	13.5 ± 0.8	383.75		11.5125
					4.31x10^-10		730.816		3.27216						107.766		3.29297
					5.84x10^-10		-607.406		-5.30155						-100.625		-3.01875
		30_1_6	476.1 ±72.5	0.11 ± 0.03	2.42x10^-10	1580.11		69.9019		0.003 ± 0.005	1162.0 ± 226.6	39.5 ± 6.0	13.2 ± 0.6	306.797		9.20391
					1.98x10^-10		359.706		5.55405						59.453		1.78359
					2.92x10^-10		-386.177		-9.7792						-67.695		-2.03086
		30_1_7	618.8 ± 155.4	0.18 ± 0.03	2.09x10^-10	2621.33		76.4413		0.005 ± 0.005	807.8 ± 29.3	48.7 ± 5.2	3.2 ± 0.6	470.547		14.1164
					1.66x10^-10		664.982		4.72936						92.812		2.78438
					2.59x10^-10		-350.864		-3.69524						-52.422		-1.57266
		30_2_1	555.1 ± 81.9	0.12 ± 0.03	7.93x10^-11	1754.12		68.392		0.01 ± 0.005	726.4 ± 25.6	39.7 ± 4.5	3.5 ± 0.6	335.977		10.0793
					5.90x10^-11		243.033		3.81302						39.414		1.18242
					1.04x10^-10		-480.248		-11.9684						-82.539		-2.47617
		30_4_1	659.7 ± 97.3	0.32 ± 0.03	2.27x10^-10	3570.13		81.5749		0.01 ± 0.005	874.3 ± 30.7	51.1 ± 5.8	13.5 ± 0.7	600.625		18.0188
					1.83x10^-10		313.699		1.43873						39.766		1.19297
					2.78x10^-10		-560.802		-3.49744						-82.539		-2.25
		30_4_2	806.7 ± 118.9	0.11 ± 0.03	3.78x10^-10	1947.03		58.6159		0.02 ± 0.006	964.7 ± 34.1	51.9 ± 6.1	14.1 ± 0.8	367.344		11.0203
					3.18x10^-10		320.438		5.8078						50.234		1.50703
					4.45x10^-10		-410.481		-11.1155						-67.969		-2.03906
		30_4_3	734.8 ± 108.4	0.10 ± 0.03	1.69x10^-10	2187.15		66.4526		0.01 ± 0.005	827.1 ± 29.4	49.9 ± 5.7	6.8 ± 0.7	405.234		12.157
					1.34x10^-10										69.61		2.08828
					2.08x10^-10		464.088		5.83204						-91.406		-2.74219
							-565.648		-11.7686
		30_7_2	1337.7 ± 465.7	0.16 ± 0.03	1.46x10^-10	2074.63		35.5707		0.03 ± 0.01	762.3 ± 26.9	34.1 ± 3.9	12.4 ± 0.8	387.656		11.6297
					1.15x10^-10										58.36		1.75078
					1.82x10^-10		381.18		9.96021						-76.56		-0.229687
							-48.2746		-1.58363
		30_7_3	282.4 ± 42.4	0.16 ± 0.03	1.89x10^-10	1132.6		75.0874		0.01 ± 0.005	709.7 ± 24.9	30.1 ± 3.6	11.5 ± 0.7	227.93		6.83789
					1.52x10^-10										43.028		0.873047
					2.32x10^-10		161.191		3.08525						-29.101		-1.29082
							-230.793		-6.40233
		30_10_1	825.2 ± 122.2	0.12 ± 0.03	5.43x10^-10	3041.24		72.9259		0.05 ± 0.006	907.1 ± 32.0	30.8 ± 3.6	39.1 ± 1.4	529.922		15.8977
					4.66x10^-10										104.297		3.12891
					6.27x10^-10		794.391		5.55956						-94.141		-2.82422
							-653.626		-7.48838
		30_10_2	231.7 ± 35.3	0.10 ± 0.03	8.62x10^-10	2626.69		91.2001		0.05 ± 0.006	765.9 ± 26.9	25.6 ± 2.9	47.6 ± 1.6	471.172		14.1352
					7.57x10^-10										144.219		4.32656
					9.76x10^-10		1059.99		2.51507						-117.383		-3.52148
							-763.303		-3.63448
		30_10_4	920.4 ± 135.8	0.22 ± 0.03	3.89x10^-10	4460.42		79.4376		0.03 ± 0.006	981.3 ± 34.9	25.8 ± 3.1	29.5 ± 1.2	709.844		21.2953
					3.28x10^-10										83.515		2.50547
					4.57x10^-10		742.144		2.87052						-84.375		-2.53125
							-695.321		-3.88398
		30_10_5	667.2 ± 98.8	0.10 ± 0.03	3.20x10^-10	2221.24		70.008		0.03 ± 0.006	827.9 ± 31.5	23.2 ± 2.8	21.4 ± 0.9	410.469		12.3141
					2.67x10^-10										83.203		2.49609
					3.80x10^-10		561.098		6.01102						-87.891		-2.63672
							-547.36		-9.8694
		30_10_7	700.6 ± 103.5	0.08 ± 0.03	2.21x10^-10	1345.8		47.9747		0.04 ± 0.006	829.1 ± 29.3	31.0 ± 3.6	38.4 ± 1.7	266.172		7.98516
					1.80x10^-10										45.742		1.37227
					2.68x10^-10		264.899		8.5281						-52.305		-1.56914
							-289.53		-14.3033
		30_10_9	270.5 ± 42.7	0.10 ± 0.03	7.05x10^-10	2574.61		89.5162		0.05 ± 0.007	737.6 ± 26.4	26.4 ± 3.1	49.4 ± 1.6	463.594		13.9078
					6.13x10^-10										136.015		4.08047
					8.05x10^-10		988.715		2.89144						-110.899		-3.32695
							-718.008		-4.08801
		30_10_10	616.1 ± 92.4	0.11 ± 0.03	3.03x10^-10	2592.76		76.2843		0.03 ± 0.006	769.9 ± 27.8	32.1 ± 3.7	44.2 ± 1.6	466.25		13.9875
					2.52x10^-10										99.688		2.99062
					3.61x10^-10		713.921		5.08342						-105.937		-3.17813
							-689.504		-8.65564
		30_10_11	659.5 ± 97.6	0.12 ± 0.03	3.95x10^-10	2504.23		73.7139		0.03 ± 0.006	767.7 ± 29.1	29.0 ± 3.4	43.9 ± 1.9	453.203		13.5961
					3.33x10^-10										83.516		2.50547
					4.63x10^-10		585.948		4.94487						-83.359		-2.50078
							-541.67		-7.31704
		30_11_1	376.9 ± 60.3	0.11 ± 0.03	6.11x10^-10	1450.93		74.0487		0.01 ± 0.002	729.7 ± 27.4	30.5 ± 3.7	12.8 ± 0.5	284.609		8.53828
					5.28x10^-10										67.891		2.03672
					7.03x10^-10		404.103		5.63143						-54.57		-1.63711
							-306.709		-6.99165
		30_16_1	602.0 ± 89.2	0.13 ± 0.03	1.14x10^-10	1478.69		59.3219		0.01 ± 0.005	806.9 ± 31.4	24.7 ± 2.9	16.3 ± 0.8	289.414		8.68242
					8.78x10^-10										28.399		0.851953
					1.45x10^-10		166.694		4.08901						-53.164		-1.59492
							-300.348		-10.4133
		30_16_2	510.1 ± 75.7	0.13 ± 0.03	3.11x10^-10	1365.77		62.6861		0.01 ± 0.005	763.5 ± 28.5	21.2 ± 2.5	3.4 ± 0.6	269.766		8.09297
					2.59x10^-10										38.164		1.14492
					3.70x10^-10		221.005		5.16953						-42.422		-1.27266
							-236.386		-7.84865
		30_16_4	431.6 ± 64.1	0.15 ± 0.03	7.30x10^-11	1737.64		75.1941		0.01 ± 0.005	758.8 ± 29.6	23.1 ± 2.8	28.6 ± 1.1	333.242		9.99727
					5.38x10^-11										29.805		0.894141
					9.62x10^-11		182.231		2.32516						-81.367		-2.44102
							-472.534		-9.30994
		30_16_5	566.0 ± 83.7	0.11 ± 0.03	4.30x10^-11	1524.28		62.902		0.01 ± 0.005	755.5 ± 28.9	23.6 ± 2.8	12.3 ± 0.8	297.266		8.91797
					2.98x10^-11										24.531		0.735938
					5.95x10^-11		144.868		3.18728						-78.477		-2.3543
							-441.388		-15.1713
		30M_3_4	399.5 ± 63.9	0.21 ± 0.03	1.65x10^-10	2579.14		84.5449		0.02 ± 0.003	867.9 ± 30.9	49.9 ± 5.7	34.6 ± 1.3	464.297		13.9289
					1.28x10^-10										43.281		1.29844
					2.09x10^-10		301.015		1.58502						-87.578		-2.62734
							-573.724		-4.46493
		30M_3_5	1763.3 ± 400.2	0.11 ± 0.03	7.76x10^-10	3055.19		42.3602		0.03 ± 0.004	869.3 ± 43.4	47.5 ± 5.7	24.1 ± 0.8	531.875		15.9563
					6.78x10^-10		681.058		10.4457						89.922		2.69766
					8.82x10^-10		-289.46		-6.11507						-40.625		-1.21875
		30M_5_2	325.1 ± 53.5	0.17 ± 0.03	2.14x10^-10	1607.64		79.8025		0.003 ± 0.002	797.2 ± 28.3	68.7 ± 28.3	None	311.484		9.34453
					1.74x10^-10		271.605								45		1.35
					2.60x10^-10		-309.52		2.89693						-53.671		-1.61014
									-4.84797
	4 days	4_1_1	803.9 ± 286.8	0.19 ± 0.03	1.54x10^-10	2486.72		67.7288		0.01 ± 0.001	842.2 ± 34.5	16.9 ± 2.1	0.8 ± 0.04	450.703		13.5211
					1.22x10^-10		897.496		8.51833						125.625		3.76875
					1.91x10^-10		-51.0087		-0.731406						-75.7812		-0.227344
		4_1_3	2713.0 ± 471.8	None	9.10x10^-11	2713.02	471.81	None		0.01 ± 0.002	874.1 ± 35.8	23.8 ± 2.9	0.7 ± 0.04	483.828		14.5148
					6.86x10^-11		-471.81								65.8594		1.97578
					1.18x10^-10										-70.2344		-2.10703
		4_3_1	166.9 ± 24.8	0.13 ± 0.03	1.06x10^-09	2605.66		93.6069		0.004 ± 0.001	747.9 ± 39.9	26.3 ± 3.4	0.5 ± 0.02	468.281		14.0484
					9.43x10^-10		875.026		1.59549						120.781		3.62344
					1.19x10^-09		-591.089		-1.896						-90.0781		-2.70234
		4_4_2	402.4 ± 59.4	0.17 ± 0.03	2.14x10^-10	1873.92		78.5552		0.01 ± 0.001	803.8 ± 30.9	12.0 ± 24.7	0.5 ± 0.04	355.625		10.6687
					1.74x10^-10		295.497		2.8937						46.875		1.40625
					2.60x10^-10		-391.363		-5.70094						-65.5469		-1.96641
		4_4_4	216.6 ± 32.0	0.13 ± 0.03	5.43x10^-10	1744.64		87.6061		0.01 ± 0.001	809.8 ± 28.9	31.9 ± 3.6	0.4 ± 0.01	334.375		10.0312
					4.66x10^-10		484.182		2.67757						77.3438		2.32031
					6.27x10^-10		-408.519		-3.81423						-69.8438		-2.09531
		4_4_5	255.0 ± 38.5	0.13 ± 0.03	5.90x10^-10	1939.88		86.8754		0.01 ± 0.001	704.4 ± 25.9	64.1 ± 7.9	0.5 ± 0.02	366.25		10.9875
					5.09x10^-10		540.408		2.84227						83.5156		2.50547
					6.79x10^-10		-430.313		-3.76974						-71.4844		-2.14453
		4_6_1	213.1 ± 42.9	0.13 ± 0.03	3.10x10^-10	2651.19		91.9828		0.01 ± 0.002	566.8 ± 40.1	33.7 ± 4.5	0.5 ± 0.06	474.844		14.2453
					2.58x10^-10		990.794		2.16679						135		4.05
					3.68x10^-10		-643.737		-2.59678						-97.8125		-2.93438
		4_9_1	455.3 ± 129.5	0.15 ± 0.03	2.37x10^-10	6340.9		92.8622		0.03 ± 0.005	515.9 ± 49.7	29.7 ± 4.5	0.9 ± 0.05	910.391		27.3117
					1.94x10^-10		3334.4		2.43218						286.484		8.59453
					2.87x10^-10		-1072.54		-1.50399						-109.922		-3.29766
		4_9_2	242.2 ± 36.9	0.12 ± 0.03	6.32x10^-10	4113.06		94.1355		0.01 ± 0.00	651.4 ± 46.4	28.7 ± 4.1	0.6 ± 0.03	668.694		20.0608
					5.47x10^-10		1477.4		1.53306						166.072		4.98216
					7.25x10^-10		-1083.84		-2.12924						-140.334		-4.21003
		4_9_3	1140.8 ± 334.1	0.14 ± 0.03	1.83x10^-10	3683.4		69.1077		0.02 ± 0.003	854.5 ± 43.3	32.3 ± 3.8	0.8 ± 0.03	615.156		18.4547
					1.46x10^-10		1286.75		7.93947						152.812		4.58438
					2.24x10^-10		-438.639		-4.26564						-57.4219		-1.72266
		4D_4_2	263.4 ± 40.3	0.16 ± 0.03	6.63x10^-10	2211.74		88.1127		0.01 ± 0.001	849.9 ± 30.9	216.5 ± 24.7	0.7 ± 0.04	409.062		12.2719
					5.75x10^-10		558.096		2.37665						82.8906		2.48672
					7.60x10^-10		-405.89		-2.70027						-64.5703		-1.93711
		4D_5_1	246.3 ± 36.3	0.14 ± 0.03	1.61x10^-10	2093.65		88.2581		0.01 ± 0.001	583.8 ± 21.5	36.3 ± 4.4	0.7 ± 0.02	390.703		11.7211
					1.28x10^-10		427.895		1.97451						65.1562		1.95469
					2.00x10^-10		-594.522		-4.68697						-97.7344		-2.93203
		4D_5_4	297.1 ± 43.7	0.14 ± 0.03	1.17x10^-10	1893.87		84.33		0.01 ± 0.001	719.8 ± 25.3	59.6 ± 6.7	0.6 ± 0.02	359.531		10.79
					9.02x10^-10		334.627		2.33161						52.0312		1.56094
					1.48x10^-10		-555.783		-6.54485						-94.7656		-2.84297
		4D_5_6	484.4 ± 83.7	0.13 ± 0.03	1.96x10^-10	3057.76		84.1978		0.01 ± 0.003	291.6 ± 38.9	20.5 ± 4.0	1.4 ± 0.10	532.344		16
					1.58x10^-10		804.489		3.25923						105.391		3.16172
					2.40x10^-10		-784.561		-5.50876						-113.828		-3.41484
		4D_6_3	752.6 ± 154.1	0.15 ± 0.03	6.95x10^-11	2316.69		67.5661		0.02 ± 0.003	352.9 ± 26.5	210.7 ± 27.5	1.2 ± 0.04	425.156		12.7547
					5.10x10^-11		362.631		4.34579						53.75		1.6125
					9.20x10^-11		-515.876		-9.35673						-81.5234		-2.4457
		4D_6_4	175.4 ± 29.9	0.17 ± 0.03	3.39x10^-11	1699.01		89.6909		0	579.7 ± 42.3	42.5 ± 6.2	0.9 ± 0.04	326.836		9.80508
					2.27x10^-11		125.733		0.695694						20.7812		0.623437
					4.82x10^-11		-622.039		-5.9792						-109.102		-3.27305
Breached
	30 minutes	30M_5_1	28.4 ± 24.5							0.00 ± 0.002	89.2 ± 0.3	2.6 ± 0.4	0.1 ± 0.30
	4 days	4_7_1	92.5 ± 27.7							0.00 ± 0.001	2.0 ± 0.5	0.3 ± 0.2	1.1 ± 0.05
