# Supplementary material
Source: publisher figshare collection journal article supplement (https://gsapubs.figshare.com/articles/dataset/_/12540434)
Supplement: Supplementary file 1 [file 1]

## 1    **APPENDIX 1. METHODOLOGY**

### 2    **Homogenization Experiments and Sample Preparation for Volatile Analysis**

3    Essentially all plagioclase-hosted MI have undergone significant post entrapment  
4    crystallization and contain one or more vapor bubbles. The reasons for the extent of post  
5    entrapment crystallization may be linked to two factors: (1) the host magmas are often  
6    significantly less primitive than the melts from which the megacrysts formed; (2) the phase  
7    equilibria of plagioclase results in twice the amount of crystallization per degree as for olivine  
8    (Kohut and Nielsen 2003). Therefore, reconstruction of the composition of the initial  
9    composition of the melt requires homogenization (Fig. DR1). Homogenization experiments  
10    were carried out using a 1-atm vertical furnace at Oregon State University by suspending 3 to  
11    6 crystals in a platinum boat within the furnace at the entrapment temperature of 1230°C.  
12    That temperature was determined based on trial and error, was constrained by the olivine  
13    plagioclase cotectic and was confirmed using a heating stage (Sinton et al., 1993; Nielsen et  
14    al., 1995; Kohut and Nielsen, 2003; Nielsen, 2011). At the end of a run the samples were  
15    quenched in water. To test plagioclase crystals are reliable pressure vessels, samples were  
16    homogenized for 30 minutes, which is a typical time for homogenization experiment, and for  
17    to 4 days. The assumption was that the total reconstructed CO<sub>2</sub> concentration of the MI should  
18    not change as a function of experimental run time. Once homogenized for post entrapment  
19    crystallization, the plagioclase crystals were polished individually by fixing them on a round  
20    glass slide with crystal bond. Coarse silica grids of 600 and 1200 µm were used to remove the  
21    crystal bond from the surface of the plagioclase crystals and expose the melt inclusions. Once  
22    the MI were exposed, alumina powders of 5, 3 and 0.1 µm were used to finish polishing and  
23    remove any silica grid left on the crystals. The crystal bond was then dissolved in acetone,  
24    followed by a cleaning in a sonic bath with an alcoholic solution for 1h. The plagioclase  
25    crystals were then pressed flat into wells filled with indium drilled into 1-inch aluminum

26 mounts. Once mounted in indium, the MI were evaluated for the following: cracks in or  
27 around the melt inclusions; any irregular melt inclusion shapes; the presence of daughter  
28 crystals; and/or the presence of unusually large (>10 % by volume of inclusion) vapor  
29 bubbles. Any MI meeting any of those criteria (~20% of total) was discarded from further  
30 analyses (Moore et al., 2015).

### 31 **Raman Analysis: CO<sub>2</sub> in the Vapor Bubbles**

32 CO<sub>2</sub> analysis within the vapor bubbles of MI were performed at Virginia Tech (VT) on a JY  
33 Horiba LabRam HR (800 mm) Raman spectrometer. The instrument was set up to work with  
34 a 514-nm argon laser, a confocal hole diameter of 400 μm, a slit width of 150 μm, and a  
35 grating of 1800 mm<sup>-1</sup>. A synthetic fluid inclusion was used as a standard to test for the  
36 reproducibility of the Fermi-diad determination (Sterner and Bodnar 1984). Each analysis  
37 was performed with three 45-second scans that were averaged. The LabSpec software was  
38 used to apply baseline correction on each analysis and make the peak fittings on the Fermi-  
39 diad by applying a Gaussian fitting. From the peak fitting results, the values of peak splitting  
40 were determined, and the CO<sub>2</sub> densities calculated following the calibration curve  $\rho = -$   
41  $36.42(0.31) + 0.355(0.01) \rho_{\text{CO}_2}$  (Lamadrid et al., 2017). After determining the CO<sub>2</sub>  
42 densities, the CO<sub>2</sub> concentrations of the vapor bubbles, and error analyses, were performed  
43 following Moore et al. (2015). It should be noted that no CO<sub>2</sub> was detected in the vapor  
44 bubbles of a melt inclusion homogenized for 4 days (sample: 4\_1\_3). Consequently, only the  
45 volatile concentrations obtained by SIMS analyses with their associated errors are displayed.

46 It is important to note that S was present as SO<sub>2</sub> within some of the vapor bubbles after the  
47 30-minute runs based on the presence of a Raman peak at ~1151 cm<sup>-1</sup>. However, we did not  
48 attempt to quantify the amount of S contained in the vapor bubbles because the Raman  
49 spectral features of SO<sub>2</sub> have not been calibrated as a function of pressure or density.

## 50 SIMS Analysis: CO<sub>2</sub> and Other Volatiles in the Glass of Melt Inclusions

51 Volatile analyses (H<sub>2</sub>O, CO<sub>2</sub>, S, F and Cl) of the melt inclusions' glasses were performed at  
52 Woods Hole Oceanographic Institution (WHOI) on a CAMECA IMS 1280, a secondary ion  
53 mass spectrometer (SIMS). These melt inclusions were the same as the ones analyzed on the  
54 Raman at VT. A synthetic forsterite with SiO<sub>2</sub> of 42 wt.% (SynFo) and a basaltic glass (519-  
55 4-1) of similar CO<sub>2</sub> concentration as expected from the MI, pressed into indium mounts, were  
56 regularly used as standards to check for instrumental drift. The mounts were cleaned, then  
57 dried in an oven at 65°C for > 2h. Once dry, the mounts were gold-coated and placed in a  
58 vacuum oven at 110°C for several hours until placed into the instrument to let them outgas.  
59 Next, each mount sat in the SIMS airlock for at least 8h at 5.0E<sup>-9</sup> torr for further outgassing  
60 before being introduced to the sample chamber at pressures < 3.0E-9 torr. <sup>133</sup>Cs<sup>+</sup> was used as  
61 the primary beam (1nA, 10 micron). The primary beam focused on a 20 μm/20 μm area, and  
62 the aperture was set up to analyze a 7.5 μm/ 7.5 μm area. Each spot was pre-sputtered for 3  
63 min, then each mass (<sup>12</sup>C, <sup>16</sup>O <sup>1</sup>H, <sup>19</sup>H, <sup>30</sup>Si, <sup>32</sup>S, <sup>35</sup>Cl) was analyzed over 5 cycles for a total  
64 analysis time of 9 min. Mass interferences of <sup>17</sup>O from <sup>16</sup>O <sup>1</sup>H, and <sup>29</sup>Si <sup>1</sup>H, from <sup>30</sup>Si were  
65 resolved by entrance and exit slit widths yielding a mass resolving power >6000. As the MI  
66 had higher S and CO<sub>2</sub> concentrations, the spot position on the sample was checked by  
67 verifying the intensity of the <sup>32</sup>S and <sup>12</sup>C. Nine standards glasses with different H<sub>2</sub>O and CO<sub>2</sub>  
68 concentrations were used to make the calibration curves on <sup>12</sup>C/<sup>30</sup>Si, <sup>16</sup>O<sup>1</sup>H/<sup>30</sup>Si, <sup>19</sup>F/<sup>30</sup>Si,  
69 <sup>32</sup>S/<sup>30</sup>Si, and <sup>35</sup>Cl/<sup>30</sup>Si. During analyses, the stability of the signal was carefully monitored for  
70 any sign of sample contamination. The detection limits were the following: 30 ppm for CO<sub>2</sub>;  
71 0.02 wt.% for H<sub>2</sub>O; 1.2 ppm for S; 1 ppm for Cl; and 1.8 ppm for F.

72 MI were determined to be “un-breached” or intact based on their S concentration. Any MI  
73 with S concentration at, or below 90 ppm was considered breached and not further considered  
74 for this study. Indeed, MORB melts are supposed to be saturated with S (Wallace and

75 Carmichael, 1992). Based on their S concentrations, only 2 MI were considered breached, one  
76 for each run time (TABLE DR1).

77 The two main sources of error were investigated to perform the error analysis. A bootstrap  
78 regression was performed on the calibration to estimate the calibration errors. A time-based  
79 background analysis was used to check for any analytical drift with time on H<sub>2</sub>O. Drift, if  
80 present, was corrected and applied to the data. As a result, the volatile concentrations  
81 presented are calculated based on the corrected calibration curves. The errors shown as 2  
82 were established by propagation analysis of the corrected calibration curves and corrected  
83 volatile concentration for each sample.

84 Once the CO<sub>2</sub> concentrations were determined from both the vapor bubbles and the melt of a  
85 single melt inclusion, total CO<sub>2</sub> reconstruction and errors associated were calculated as per  
86 Moore et al. (2015). Following Moore et al. (2015), the first source of error is in the 2-D  
87 measurement of the long and short axes of both the melt inclusions and vapor bubbles. These  
88 errors are estimated to be 0.5  $\mu$ m for any 2-D measurements. Errors on 2-D measurements are  
89 then propagated on the estimation of the volumes of both vapor bubbles and melt inclusions,  
90 which themselves are propagated with SIMS and Raman analytical errors to give the final  
91 errors on the CO<sub>2</sub> concentrations as + and – for one datapoint (TABLE DR1).

92 Pressures were calculated using VolatileCalc2.0 (Newman and Lowenstern, 2002) using SiO<sub>2</sub>  
93 = 49 wt.%, T = 1230°C, as well as the H<sub>2</sub>O analyzed from the melt inclusions' glass, and the  
94 total CO<sub>2</sub> reconstructed from vapor bubble and glass analyses. Although more recent models  
95 are available to interpret H<sub>2</sub>O-CO<sub>2</sub> data from MI (Papale et al., 2006; Shishkina et al., 2014;  
96 Ghiorso and Gualda, 2015), the models are all based on the same fundamental experimental  
97 data and differences between models are insignificant for the purposes of this study.

98 All data can be found in TABLE DR1.

**T-test: Statistics comparing the volatile and pressure estimates of the 30-min and 4-day runs**

T-tests were calculated using the online GraphPad software to compare the volatile and pressure estimates obtained for the 30-minute and 4-day runs. We used the unpaired t-test option that compares two datasets of the same parameter. The aim was to understand whether the differences observed were statistically significant. The t-tests compare one variable at a time for the two experimental run times. All the data obtained for CO<sub>2</sub> in the glass, H<sub>2</sub>O in the glass, total CO<sub>2</sub> reconstructed, pressures, and %CO<sub>2</sub> present within the vapor bubbles were computed for these t-tests (TABLE DR2). The outcome of a t-test is the P-value. The P value is comprised between 0 and 1 and represent the probability for one variable represented in two populations for the null hypothesis to be true. In other words, the closest P is to 0, the more likely the two populations sharing that same variable are statistically distinct. Note that for %CO<sub>2</sub>, we discarded 4\_1\_3 which has no CO<sub>2</sub> within its vapor bubble.

**APPENDIX 2. MG# OF THE MELT INCLUSIONS AND POST ENTRAPMENT CRYSTALLIZATION CALCULATIONS**

To assess the primitiveness of the MI, the Mg# of MI held at 1230°C for both 30 minutes and 4 days were calculated. Mg# was calculated assuming

$$\text{Fe}^{2+} = 0.9 \times \text{FeO}_{\text{total}}, (\text{Equation 1})$$

so that  $\text{Mg\#} = 100 \times (\text{Mg} / (\text{Mg} + \text{Fe}^{2+}))$  in atomic proportions (Equation 2; Fig. DR2; TABLE DR3).

This data was gathered on different set of MI than those presented in this review, but they are nevertheless from the same sample (A91-1R). Due to the small size of the MI (20-30 μm), it was impossible to perform both chemical and volatile analyses without C contamination from coating for EMP analyses. The calculated Mg# are near-primitive melt compositions to both

experimental run times (Michael and Chase, 1987; Michael and Graham, 2015; Saal et al., 2002). For each dataset, the maximum Mg# was assumed to be unaffected by post-entrapment crystallization, therefore was used as the basis for the calculation of a linear regression. Based on the Mg#, the F parameter was calculated so that

$$F = \text{Mg\#} / \text{Mg\#}_{\text{highest of the dataset}} \quad (\text{Equation 3})$$

From the F parameter, the linear regression was calculated using

$$\% \text{crystallization} = 100 - (F * 100) \quad (\text{Equation 4})$$

The Mg# of the 30-minute runs show near-primary compositions compared to the host lavas. MI heated for 30 minutes have a Mg# of  $67.53 \pm 2.48$  (2  $\sigma$ ). The Mg# are higher in the 4-day runs due to diffusive re-equilibration with their host (Fig. DR2; TABLE DR3). The linear regressions indicate that the MI have seen <10% of fractional crystallization post-homogenization experiment compared to that representing the most primitive member of the array of melts. The linear regressions also show that our MI are near to being primary in nature (Michael and Graham., 2015; TABLE DR3; Fig. DR2). In addition, the high Mg# of our samples suggest that Fo<sub>88.5</sub> olivine would be in equilibrium with those melts (Hughes, 1982). We suggest that these olivine crystals are found within the same troctolite cumulates that our plagioclase crystals originated from, but that their high density prevents them from being erupted with the plagioclase megacrysts.

The 4-day runs exhibit more primitive values and fit on a different linear regression than the 30-minute runs (Fig. DR2; TABLE DR3). This difference is likely due to re-equilibration processes occurring with increasing run times, where Mg from the plagioclase-hosts diffuses within the MI. Therefore, the 4-day data represents anomalously primitive melts, as the original chemistry of the MI was irreversibly modified by experimentation.

## REFERENCES CITED

- Ghiorso, M. S., and Gualda, G. A., 2015, An H<sub>2</sub>O–CO<sub>2</sub> mixed fluid saturation model compatible with rhyolite-MELTS: Contributions to Mineralogy and Petrology, v.169, p.53, <https://doi.org/10.1007/s00410-015-1141-8>.
- Kohut, E.J., and Nielsen, R.L., 2003, Low-pressure phase equilibria of anhydrous anorthite bearing mafic magmas: Geochemistry, Geophysical Geosystems, v.4, p. 1057, <https://doi.org/10.1029/2002GC000451>.
- Lamadrid, H. M., Moore, L. R., Moncada, D., Rimstidt, J. D., Burruss, R. C., and Bodnar, R. J., 2017, Reassessment of the Raman CO<sub>2</sub> densimeter: Chemical Geology, v.450, p.210-222, <https://doi.org/10.1016/j.chemgeo.2016.12.034>.
- Michael, P.J., and Chase, R.L., 1987, The influence of primary magma composition, H<sub>2</sub>O and pressure on mid-ocean ridge basalt differentiation. Contributions to Mineralogy and Petrology, v.96, i.2, p.245-263.
- Michael, P.J., and Graham, D.W., 2015, The behavior and concentration of CO<sub>2</sub> in the suboceanic mantle: inferences from undegassed ocean ridge and ocean island basalts: Lithos, v. 236-237, p. 338-351, <https://doi.org/10.1016/j.lithos.2015.08.020>.
- Moore, R.L., Gazel, E., Tuohy, R, Lloyd, A.S., Esposito, R., Steele-MacInnis, M., Hauri, E.H., Wallace, P.J., Plank, T., and Bodnar, R.J., 2015, Bubbles matter: an assessment of the contribution of vapor bubbles to melt inclusion volatile budgets: The American Mineralogists, v.100, p.806-823. <https://doi.org/10.2138/am-2015-5036>.
- Newman, S., and Lowenstern, J.B., 2002, VolatileCalc: a silicate melt-H<sub>2</sub>O-CO<sub>2</sub> solution model written in Visual Basic Excel: Computers & Geosciences, v.2, p.597-604, [https://doi.org/10.1016/S0098-3004\(01\)00081-4](https://doi.org/10.1016/S0098-3004(01)00081-4).
- Nielsen, R.L., Crum, J., Bourgeois, R., Hascall, K., Forsythe, L.M., Fisk, M.R., and Christie, D.M., 1995, Melt inclusions in high-An plagioclase from the Gorda Ridge: an example

171 of the local diversity of MORB parent magmas: Contributions to Mineralogy and  
 172 Petrology, v.122, p.34-50.

173 Nielsen, Roger L., 2011, The effects of rehomogenization on plagioclase hosted melt  
 174 inclusions: Geochemistry, Geophysics, Geosystems, v.12, no.10,  
 175 <https://doi.org/10.1029/2011GC003822>.

176 Papale, P., Moretti, R., and Barbato, D., 2006, The compositional dependence of the  
 177 saturation surface of H<sub>2</sub>O+ CO<sub>2</sub> fluids in silicate melts: Chemical Geology, v. 229,  
 178 no. 1-3, p. 78-95, <https://doi.org/10.1016/j.chemgeo.2006.01.013>.

179 Saal, A. E., Hauri, E. H., Langmuir, C. H., and Perfit, M. R., 2002, Vapour undersaturation in  
 180 primitive mid-ocean-ridge basalt and the volatile concentration of Earth's upper  
 181 mantle. Nature, v. 419, p.451-455.

182 Shishkina, T.A., Botcharnikov, R.E., Holtz, F., Almeev, R.R., Jazwa, A.M., Jakubiak, A.A.,  
 183 2014, Compositional and pressure effects on the solubility of H<sub>2</sub>O and CO<sub>2</sub> in mafic  
 184 melts: Chemical Geology, v.388, p.112-129,  
 185 <https://doi.org/10.1016/j.chemgeo.2014.09.001>.

186 Sinton, C. W., Christie, D. M., Coombs, V. L., Nielsen, R. L., and Fisk, M. R., 1993, Near-  
 187 primary melt inclusions in anorthite phenocrysts from the Galapagos Platform: Earth  
 188 and Planetary Science Letters, v. 119, no.4, p.527-537.

189 Sterner, S.M., and Bodnar, R.J., 1984, Synthetic fluid inclusions in natural quartz I.  
 190 Compositional types synthesized and applications to experimental geochemistry:  
 191 Geochimica et Cosmochimica Acta, v. 48, p.2659–2668.

192 Wallace, P.J., and Carmichael, I.S.E., 1994, Sulfur speciation in submarine basaltic glasses as  
 193 determined by measurements of S Ka X-ray wavelength shifts: The American  
 194 Mineralogist, v.79, p.161-167.

195



## FIGURE CAPTIONS

Figure DR1. A) BSE images of MI prior to homogenization experiment showing post entrapment crystallization in grey and vapor bubbles in black. B) BSE image post homogenization showing MI free of post entrapment crystallization, but with vapor bubbles.

TABLE DR1. Details of the run times, sample names, CO<sub>2</sub> concentrations in both glass and vapor bubble of melt inclusions, as well as the total CO<sub>2</sub> concentrations. The top of the table shows the data for MI that were considered for this study. The lower part of the table shows the dissolved volatile concentrations of the two melt inclusions that breached and were discarded. The vapor bubble volumes are shown in column 6 with their lower and upper volume estimates (based on error propagation). The H<sub>2</sub>O, SO<sub>2</sub>, Cl, and F concentrations of the melt inclusion glasses are also shown. The calculated pressures from VolatileCalc 2.0 are displayed (Newman and Lowenstern, 2002), as well as the depths calculated by multiplying by 3 the pressure estimates. The errors on the volatile concentrations, the pressures and depths are shown as well.

TABLE DR2. Results of the t-tests performed to prove whether two groups of one variable are statistically different. The P values constitute the outcome of the t-test. Results from CO<sub>2</sub> (glass), H<sub>2</sub>O (glass), Total CO<sub>2</sub>, Pressures and % CO<sub>2</sub> in vapor bubbles are statistically compared in between the 30-minute and 4-day runs.

Figure DR2. Graph showing the results of the linear regression showing Mg# versus % crystallization for MI homogenized for both 30 minutes and 4 days.

TABLE DR3. Mg#, MgO (wt.%), FeO (wt.%), parameter F, and % crystallization calculation assessed by linear regression for MI homogenized for both 30 minutes and 4 days. Means and

219 standard deviations (2 ) are also shown.

220

Before homogenization experiment

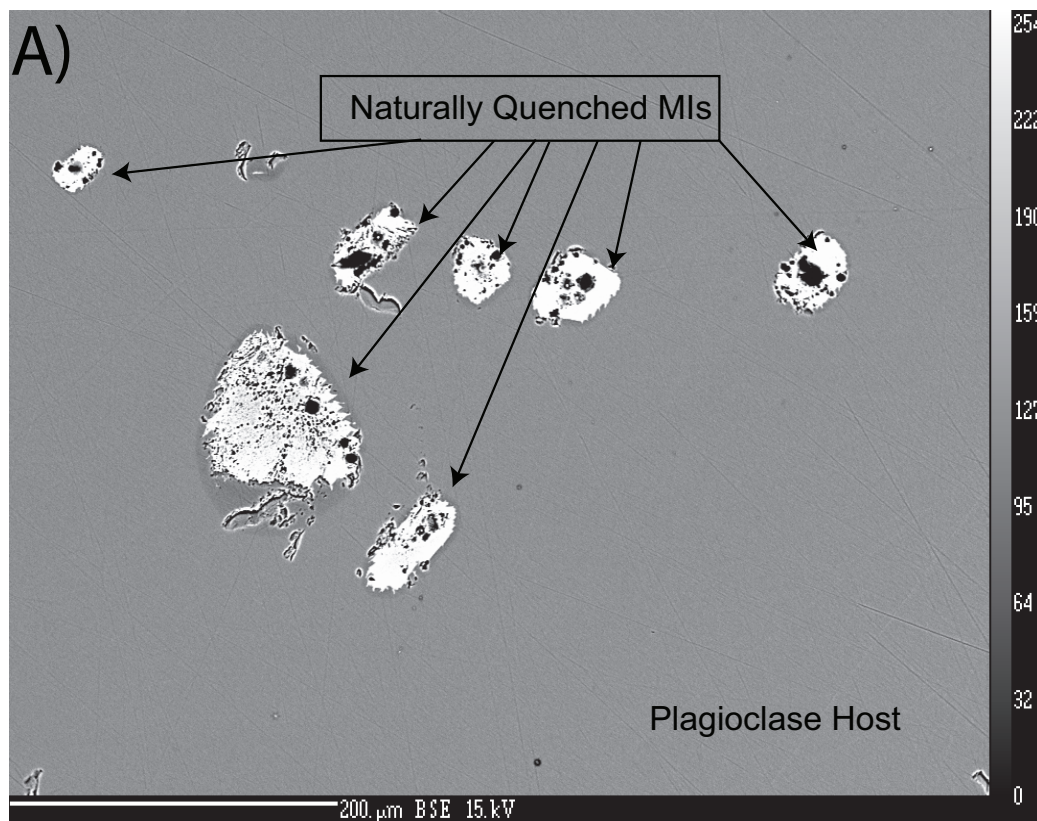

After homogenization experiment

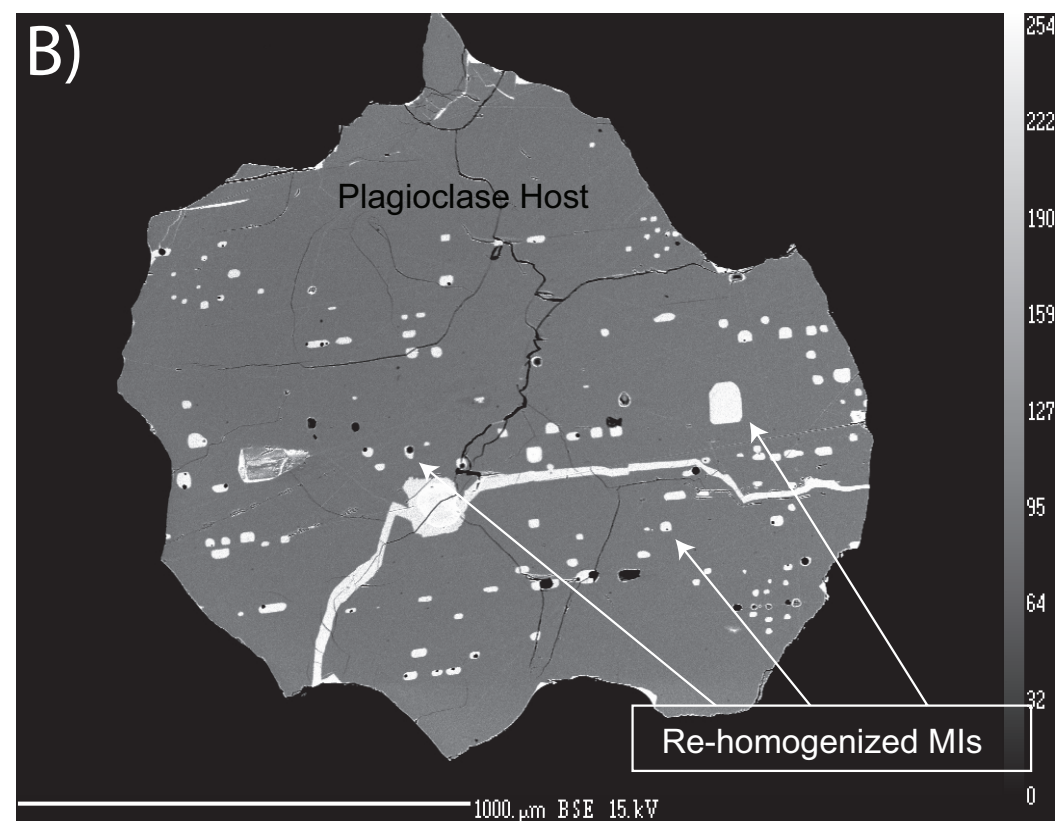

Fig. DR1

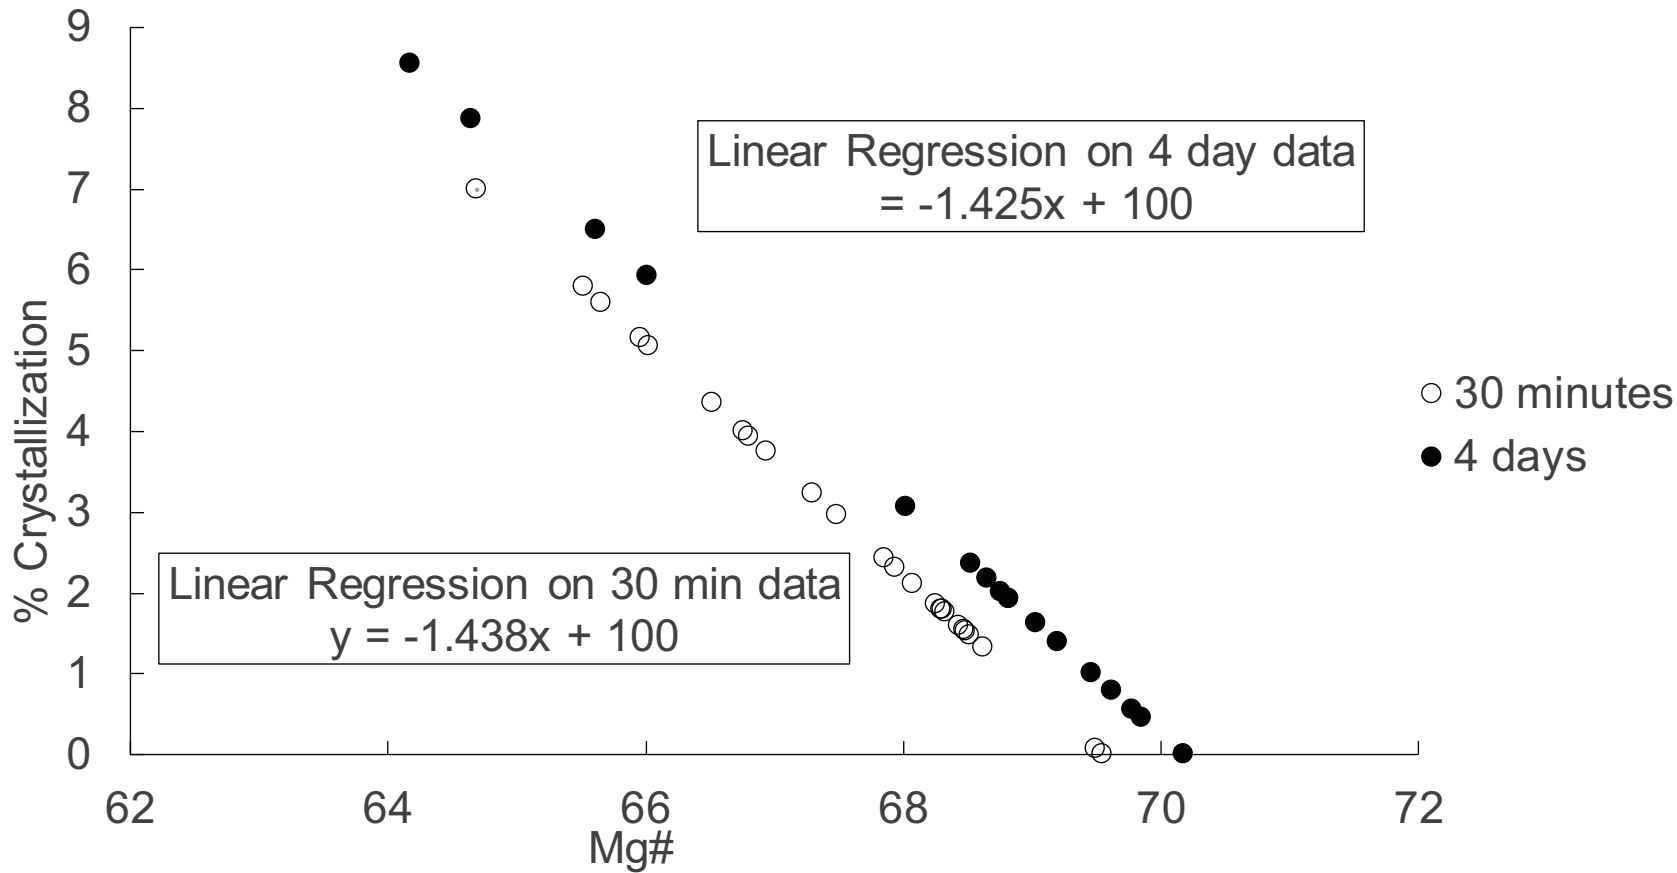

TABLE DR1. Details of the volatile content and pressure and depth of entrapment for each MI analyzed

TABLE DR2. Unpaired t-test results

|                                        | <b>P value</b> | <b>Statistically different?</b> |
|----------------------------------------|----------------|---------------------------------|
| <b>CO<sub>2</sub> in glass</b>         | 0.70           | No                              |
| <b>H<sub>2</sub>O in glass</b>         | 0.05           | No                              |
| <b>Total CO<sub>2</sub></b>            | 0.13           | No                              |
| <b>Pressures</b>                       | 0.13           | No                              |
| <b>%CO<sub>2</sub> in vapor bubble</b> | 0.006          | Yes                             |

TABLE DR3. Details of Mg#, MgO, FeO, F parameter, and % crystallization for each MI

| 30 minutes                  | Mg# (Fe2+)   | MgO (wt%)   | FeO (wt%)   | F           | % crystallized |
|-----------------------------|--------------|-------------|-------------|-------------|----------------|
|                             | 69.55        | 8.59        | 7.45        | 1.00        | 0.00           |
|                             | 69.50        | 8.30        | 7.21        | 1.00        | 0.07           |
|                             | 68.63        | 8.48        | 7.68        | 0.99        | 1.32           |
|                             | 68.52        | 8.68        | 7.90        | 0.99        | 1.48           |
|                             | 68.49        | 8.44        | 7.69        | 0.98        | 1.52           |
|                             | 68.48        | 8.48        | 7.97        | 0.98        | 1.54           |
|                             | 68.44        | 8.36        | 7.63        | 0.98        | 1.60           |
|                             | 68.33        | 8.47        | 7.94        | 0.98        | 1.75           |
|                             | 68.30        | 8.47        | 7.78        | 0.98        | 1.79           |
|                             | 68.29        | 8.16        | 7.50        | 0.98        | 1.80           |
|                             | 68.25        | 8.48        | 7.79        | 0.98        | 1.86           |
|                             | 68.08        | 7.87        | 8.21        | 0.98        | 2.11           |
|                             | 67.94        | 8.50        | 7.95        | 0.98        | 2.31           |
|                             | 67.86        | 8.16        | 7.66        | 0.98        | 2.43           |
|                             | 67.49        | 8.60        | 8.20        | 0.97        | 2.96           |
|                             | 67.30        | 7.97        | 7.53        | 0.97        | 3.23           |
|                             | 66.94        | 7.75        | 7.73        | 0.96        | 3.75           |
|                             | 66.81        | 8.54        | 7.79        | 0.96        | 3.94           |
|                             | 66.76        | 8.42        | 8.30        | 0.96        | 4.01           |
|                             | 66.52        | 7.95        | 7.66        | 0.96        | 4.36           |
|                             | 66.03        | 8.23        | 8.38        | 0.95        | 5.06           |
|                             | 65.96        | 8.30        | 8.48        | 0.95        | 5.16           |
|                             | 65.65        | 7.78        | 8.06        | 0.94        | 5.60           |
|                             | 65.52        | 7.90        | 7.72        | 0.94        | 5.79           |
|                             | 64.69        | 8.20        | 8.86        | 0.93        | 6.99           |
| <b>mean</b>                 | <b>67.53</b> | <b>8.28</b> | <b>7.88</b> | <b>0.97</b> | <b>2.90</b>    |
| <b>2<math>\sigma</math></b> | <b>2.48</b>  | <b>0.54</b> | <b>0.72</b> | <b>0.04</b> | <b>3.57</b>    |

| 4 days                      | Mg# (Fe2+)   | MgO (wt%)   | FeO (wt%)   | F           | % crystallized |
|-----------------------------|--------------|-------------|-------------|-------------|----------------|
|                             | 70.17        | 9.43        | 7.94        | 1.00        | 0.00           |
|                             | 69.85        | 9.45        | 8.08        | 1.00        | 0.46           |
|                             | 69.78        | 9.27        | 7.95        | 0.99        | 0.56           |
|                             | 69.62        | 9.39        | 8.11        | 0.99        | 0.78           |
|                             | 69.46        | 9.32        | 8.12        | 0.99        | 1.01           |
|                             | 69.19        | 8.98        | 7.92        | 0.99        | 1.39           |
|                             | 69.04        | 9.03        | 8.02        | 0.98        | 1.62           |
|                             | 68.83        | 9.03        | 8.10        | 0.98        | 1.92           |
|                             | 68.83        | 8.93        | 8.01        | 0.98        | 1.92           |
|                             | 68.76        | 8.98        | 8.08        | 0.98        | 2.01           |
|                             | 68.65        | 8.93        | 8.08        | 0.98        | 2.17           |
|                             | 68.52        | 8.93        | 8.13        | 0.98        | 2.35           |
|                             | 68.03        | 8.85        | 8.24        | 0.97        | 3.06           |
|                             | 66.01        | 8.67        | 8.84        | 0.94        | 5.93           |
|                             | 65.62        | 8.67        | 9.00        | 0.94        | 6.49           |
|                             | 64.65        | 8.73        | 9.45        | 0.92        | 7.87           |
|                             | 64.17        | 8.59        | 9.50        | 0.91        | 8.55           |
| <b>mean</b>                 | <b>68.19</b> | <b>9.01</b> | <b>8.33</b> | <b>0.97</b> | <b>2.83</b>    |
| <b>2<math>\sigma</math></b> | <b>3.63</b>  | <b>0.53</b> | <b>1.02</b> | <b>0.05</b> | <b>5.18</b>    |

## 1. Unpaired $t$ test results CO<sub>2</sub> IN GLASS

### P value and statistical significance:

The two-tailed P value equals 0.7011

By conventional criteria, this difference is considered to be not statistically significant.

### Confidence interval:

The mean of 30 minutes minus 4 days equals 57.3646

95% confidence interval of this difference: From -242.3992 to 357.1284

### Intermediate values used in calculations:

$t = 0.3865$

$df = 41$

standard error of difference = 148.432

### Learn more:

GraphPad's web site includes portions of the manual for GraphPad Prism that can help you learn statistics. First, review the meaning of [P values](#) and [confidence intervals](#). Then learn how to interpret results from an [unpaired](#) or [paired](#)  $t$  test. These links include GraphPad's popular *analysis checklists*.

### Review your data:

| Group | 30 minutes | 4 days   |
|-------|------------|----------|
| Mean  | 609.1415   | 551.7769 |
| SD    | 338.2730   | 637.7026 |
| SEM   | 65.1007    | 159.4256 |
| N     | 27         | 16       |

## 2. Unpaired $t$ test results H<sub>2</sub>O IN GLASS

### P value and statistical significance:

The two-tailed P value equals 0.0512

By conventional criteria, this difference is considered to be not quite statistically significant.

### Confidence interval:

The mean of 30 minutes minus 4 days equals 0.00835

95% confidence interval of this difference: From -0.00005 to 0.01674

### Intermediate values used in calculations:

$t = 2.0085$

$df = 41$

standard error of difference = 0.004

### Learn more:

GraphPad's web site includes portions of the manual for GraphPad Prism that can help you learn statistics. First, review the meaning of [P values](#) and [confidence intervals](#). Then learn how to interpret results from an [unpaired](#) or [paired](#)  $t$  test. These links include GraphPad's popular *analysis checklists*.

### Review your data:

| Group | 30 minutes | 4 days  |
|-------|------------|---------|
| Mean  | 0.01922    | 0.01088 |
| SD    | 0.01555    | 0.00741 |
| SEM   | 0.00299    | 0.00185 |
| N     | 27         | 16      |

### 3. Unpaired *t* test results TOTAL CO<sub>2</sub>

**P value and statistical significance:**

The two-tailed P value equals 0.1349

By conventional criteria, this difference is considered to be not statistically significant.

**Confidence interval:**

The mean of 30 minutes minus 4 days equals -460.97498

95% confidence interval of this difference: From -1071.36174 to 149.41178

**Intermediate values used in calculations:**

$t = 1.5252$

$df = 41$

standard error of difference = 302.240

**Learn more:**

GraphPad's web site includes portions of the manual for GraphPad Prism that can help you learn statistics. First, review the meaning of [P values](#) and [confidence intervals](#) . Then learn how to interpret results from an [unpaired](#) or [paired](#) *t* test. These links include GraphPad's popular *analysis checklists* .

**Review your data:**

| Group | 30 minutes | 4 days     |
|-------|------------|------------|
| Mean  | 2253.06315 | 2714.03813 |
| SD    | 800.17101  | 1182.65992 |
| SEM   | 153.99298  | 295.66498  |
| N     | 27         | 16         |

### 4. Unpaired *t* test results PRESSURES

**P value and statistical significance:**

The two-tailed P value equals 0.1293

By conventional criteria, this difference is considered to be not statistically significant.

**Confidence interval:**

The mean of 30 minutes minus 4 days equals -642.8940

95% confidence interval of this difference: From -1481.5353 to 195.7474

**Intermediate values used in calculations:**

$t = 1.5482$



df = 41  
standard error of difference = 415.263

**Learn more:**

GraphPad's web site includes portions of the manual for GraphPad Prism that can help you learn statistics. First, review the meaning of [P values](#) and [confidence intervals](#). Then learn how to interpret results from an [unpaired](#) or [paired](#) *t* test. These links include GraphPad's popular *analysis checklists*.

**Review your data:**

| Group | 30 minutes | 4 days    |
|-------|------------|-----------|
| Mean  | 4089.4685  | 4732.3625 |
| SD    | 1184.1142  | 1518.2325 |
| SEM   | 227.8829   | 379.5581  |
| N     | 27         | 16        |

## 5. Unpaired *t* test results for %CO<sub>2</sub>

**P value and statistical significance:**

The two-tailed P value equals 0.0064

By conventional criteria, this difference is considered to be very statistically significant.

**Confidence interval:**

The mean of 30 minutes minus 4 days equals -11.8188

95% confidence interval of this difference: From -20.1170 to -3.5206

**Intermediate values used in calculations:**

$t = 2.8785$

df = 40

standard error of difference = 4.106

**Learn more:**

GraphPad's web site includes portions of the manual for GraphPad Prism that can help you learn statistics. First, review the meaning of [P values](#) and [confidence intervals](#). Then learn how to interpret results from an [unpaired](#) or [paired](#) *t* test. These links include GraphPad's popular *analysis checklists*.

**Review your data:**

| Group | 30 minutes | 4 days  |
|-------|------------|---------|
| Mean  | 71.3052    | 83.1240 |
| SD    | 14.1256    | 9.6898  |
| SEM   | 2.7185     | 2.5019  |
| N     | 27         | 15      |
